# Supplementary material
Source: PubMed Central journal article supplement (PMC2818905)
Supplement: 0909597107_pnas.0909597107_SI.pdf [file 0909597107_pnas.0909597107_SI.pdf]

# Supporting Information

Treiser et al. 10.1073/pnas.0909597107

| Features                             | Definition                                                                                                                                                                                                                         |
|--------------------------------------|------------------------------------------------------------------------------------------------------------------------------------------------------------------------------------------------------------------------------------|
| <b>Angle</b>                         | Reports the angle between the vertical axis and the major axis of the equivalent ellipse. Within the context of this study it would capture randomly oriented versus aligned cell populations.                                     |
| <b>Area</b>                          | Reports the total actin area of each cell.                                                                                                                                                                                         |
| <b>Polygonal Area</b>                | Reports the area of the polygon that defines the object's outline.                                                                                                                                                                 |
| <b>Area/Box</b>                      | Reports the ratio between the area of each object and the area of the imaginary bounding box.                                                                                                                                      |
| <b>Aspect</b>                        | Reports the ratio between the major and minor axes of the ellipse with the same area, first and second order moments of the cell.                                                                                                  |
| <b>Axis (major)</b>                  | Reports the length of the major axis of the ellipse with the same area, first and second order moments of the cell.                                                                                                                |
| <b>Axis (minor)</b>                  | Reports the length of the minor axis of the ellipse with the same area, first and second order moments of the cell.                                                                                                                |
| <b>Box Height</b>                    | Reports the height of the smallest bounding box that completely encompasses the whole cell.                                                                                                                                        |
| <b>Box Width</b>                     | Reports the width of the smallest bounding box that completely encompasses the whole cell.                                                                                                                                         |
| <b>Box Ratio</b>                     | Reports the ratio between the Box Width and Box Height                                                                                                                                                                             |
| <b>Dendrites</b>                     | Reports the number of 1-pixel thick open branches. Within the context of the actin cytoskeleton it represents the number of processes stemming from the cell.                                                                      |
| <b>Dendritic Length</b>              | Reports the total length of all dendrites.                                                                                                                                                                                         |
| <b>Maximum Diameter</b>              | Reports the length of the longest line joining two outline points and passing through the centroid of the cell.                                                                                                                    |
| <b>Mean Diameter</b>                 | Reports the average length of the diameters.                                                                                                                                                                                       |
| <b>Minimum Diameter</b>              | Reports the length of the shortest line joining two outline points and passing through the centroid of the cell.                                                                                                                   |
| <b>End Points</b>                    | Reports the number of 1-pixel thick processes stemming from the cell.                                                                                                                                                              |
| <b>Maximum Feret Length</b>          | Reports the longest caliper length.                                                                                                                                                                                                |
| <b>Mean Feret Length</b>             | Reports the average caliper length.                                                                                                                                                                                                |
| <b>Minimum Feret Length</b>          | Reports the shortest caliper length.                                                                                                                                                                                               |
| <b>Fractal Dimension</b>             | Reports the fractal dimension of the cell's outline.                                                                                                                                                                               |
| <b>Cell Area/Total Area</b>          | Reports the ratio between the area of the cell to that of the entire field of view (10x6 tile scan image).                                                                                                                         |
| <b>Perimeter</b>                     | Reports the length of the outline of each cell using a polygonal outline.                                                                                                                                                          |
| <b>Perimeter2</b>                    | Faster but less accurate measure of the perimeter.                                                                                                                                                                                 |
| <b>Perimeter3</b>                    | Reports a corrected chain code length of the cell perimeter.                                                                                                                                                                       |
| <b>Convex Perimeter</b>              | Reports the perimeter of the convex outline of each cell.                                                                                                                                                                          |
| <b>Elliptical Perimeter</b>          | Reports the perimeter of the ellipse surrounding the outline of each cell.                                                                                                                                                         |
| <b>Perimeter Ratio</b>               | Reports the ratio of the convex perimeter to the perimeter outline of each cell                                                                                                                                                    |
| <b>Maximum Radius</b>                | Reports the maximum distance between each cell's centroid pixel position and its perimeter.                                                                                                                                        |
| <b>Minimum Radius</b>                | Reports the minimum distance between each cell's centroid pixel position and its perimeter.                                                                                                                                        |
| <b>Radius Ratio</b>                  | Reports the ratio between Max Radius and Min Radius for each object, as determined by Max Radius / Min Radius.                                                                                                                     |
| <b>Roundness</b>                     | Reports the roundness of each object, as determined by the following formula: (perimeter <sup>2</sup> ) / (4 * π * area). Circular cells will have a roundness = 1; other shapes will have a roundness > 1.                        |
| <b>Size (Length)</b>                 | Reports the feret diameter (caliper length) along the major axis of the cell.                                                                                                                                                      |
| <b>Size (Width)</b>                  | Reports the feret diameter (caliper length) along the minor axis of the cell.                                                                                                                                                      |
| <b>Mean Density</b>                  | Reports the mean intensity of all pixels within a cell. Correlates to the average amount of fluorescently tagged phalloidin present within a given cell.                                                                           |
| <b>Standard Deviation of Density</b> | Reports the standard deviation of the intensity of pixels within a cell. This represents the degree to which the phalloidin stained cytoskeleton is localized into distinct filaments of equal staining intensity.                 |
| <b>Sum of the Density</b>            | Reports the sum of the total intensity values of all pixels within a cell. Corresponds to the total amount of positive phalloidin-staining within the cell.                                                                        |
| <b>Integrated Optical Density</b>    | Reports the average intensity of each object normalized by the area of the cell.                                                                                                                                                   |
| <b>Holes</b>                         | Reports the number of independent contiguous areas with no staining within a cell.                                                                                                                                                 |
| <b>Hole Area</b>                     | Reports the area of holes within an object.                                                                                                                                                                                        |
| <b>Hole Ratio</b>                    | Reports the ratio of the object area excluding holes, to the total area of the object, as determined by Area / (Area + Hole Area).                                                                                                 |
| <b>Margination</b>                   | Reports the distribution of intensity between the center of the cell and the edge of the cell. Describes the relative spatial distribution of actin filaments within the cell.                                                     |
| <b>Heterogeneity</b>                 | Reports the fraction of pixels that vary more than 10% from the average intensity of the cell. Is a textural parameter that describes the degree to which the actin filaments are organized into homogeneously stained structures. |
| <b>Clumpiness</b>                    | The fraction of heterogeneous pixels remaining in a cell after an erosion process. It reflects the object texture and the degree to which actin filaments are organized into filamentous structures.                               |

Fig. S1. Table of 43 actin fluororeporter defined morphometric features for individual hMSCs. This table lists the 43 actin-based features quantified for each cell. The definition of the feature and its probable significance to actin filament organization are listed. Shape features are highlighted in blue, intensity features are highlighted in green, and textural/organizational features are highlighted in red.



| Polymer                                                                                                                                            | Molecular Weight (Da)                          | PDI | T <sub>g</sub> (°C) | Air Water Contact Angle |
|----------------------------------------------------------------------------------------------------------------------------------------------------|------------------------------------------------|-----|---------------------|-------------------------|
| 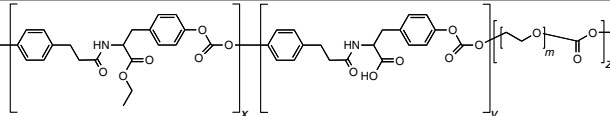 <p>poly(82%DTE-co-10%DT-co-8%PEG<sub>1K</sub> carbonate)</p>     | M <sub>n</sub> = 120K<br>M <sub>w</sub> = 171K | 1.4 | 46<br>20            | 72.5° ± 2.6             |
|  <p>poly(71%tetrahydrofurfuryl-co-29%-isobornyl methacrylate)</p> | M <sub>n</sub> = 249K<br>M <sub>w</sub> = 514K | 2.1 | 56                  | 68.2° ± 1.0             |
|  <p>poly(90%DTE-co-10%DT carbonate)</p>                           | M <sub>n</sub> = 241K<br>M <sub>w</sub> = 316K | 1.3 | 101                 | 72.7° ± 1.4             |
|  <p>poly(50%D,L-lactic-co-50%glycolic acid)</p>                   | M <sub>n</sub> = 50K<br>M <sub>w</sub> = 88K   | 1.8 | 42                  | 70.8° ± 0.9             |
|  <p>poly(70%methacrylic acid-co-30%methyl methacrylate)</p>      | M <sub>n</sub> = 87K<br>M <sub>w</sub> = 107K  | 1.2 | NF                  | 80.1° ± 1.0             |
|  <p>poly(78%benzyl-co-22%hydroxypropyl methacrylate)</p>        | M <sub>n</sub> = 121K<br>M <sub>w</sub> = 308K | 2.5 | 72                  | 63.5° ± 4.4             |
|  <p>poly(30%cyclohexyl-co-70%hydroxypropyl methacrylate)</p>    | M <sub>n</sub> = 331K<br>M <sub>w</sub> = 742K | 2.2 | 92                  | 89.9° ± 2.3             |
|  <p>poly(L-lactic acid)</p>                                     | M <sub>n</sub> = 109K<br>M <sub>w</sub> = 182K | 1.7 | 66                  | 73.7° ± 0.8             |

**Fig. 54.** The single cell morphometric methodology can be used to assess hMSC differentiation on a wide array of biomaterials. The eight synthetic materials utilized to promote altered bone versus non-bone differentiation ratios are shown. Chemical formula, backbone diagram, molecular weight ( $M_n$ ,  $M_w$ ), polydispersity (PDI), glass transition temperatures ( $T_g$ ) and air-water contact angle is reported for all the materials. All values were measured except for the  $T_g$  for PLLA and PLGA, which were obtained from the literature. As can be seen, the morphometric approach can be applied on materials representing a varied material space. Three separate classes of synthetic materials were chosen including polycarbonates, polymethacrylates, and poly( $\alpha$ -hydroxy ester)s.



| 24 hrs: Glass Substrates with Fibronectin Pre-treatment |                      |                        | Glass Substrates without Fibronectin Pre-treatment |                        |                                          |                                        |
|---------------------------------------------------------|----------------------|------------------------|----------------------------------------------------|------------------------|------------------------------------------|----------------------------------------|
| Donor 1 Passage 2                                       | Donor 2 Passage 2    | Donor 1 Passage 4      | 24 hrs                                             | 48 hrs                 | 72 hrs                                   | 96 hrs                                 |
| Perimeter <sup>2</sup>                                  | Std. Dev. of Density | Mean Density           | Fractal Dimension                                  | Perimeter <sup>2</sup> | All 43 Descriptors                       | All 43 descriptors                     |
| Hole Ratio                                              | Hole Ratio           | Holes                  | Cell Area/Total Area                               | Dendrites              | Mean Density                             | Sum of the Density                     |
| Box Height                                              | Holes                | Clumpiness             | Mean Density                                       | Cell Area/Total Area   | w/o Mean Density                         | w/o Density Sum                        |
| Size (Width)                                            | Size (Width)         | Perimeter <sup>2</sup> | Perimeter <sup>2</sup>                             | Axis (Major)           | Dendrites                                | Dendrites                              |
| Holes                                                   | Area/Box             | Hole Ratio             | Area                                               | Fractal Dimension      |                                          | Clumpiness                             |
| Cell Area/Total Area                                    | Minimum Diameter     | Box Width              | Margination                                        | Area/Box               | w/o Mean Density, Dendrites              | w/o Density Sum, Dendrites, Clumpiness |
| Polygonal Area                                          | Clumpiness           | Polygonal Area         | Area/Box                                           | Mean Density           | Sum of the Density                       | Perimeter <sup>2</sup>                 |
| Box Ratio                                               | Box Ratio            | Roundness              | Aspect                                             | Minimum Diameter       |                                          | Fractal Dimension                      |
| Perimeter Ratio                                         | Mean Density         | Maximum Diameter       | Box Ratio                                          | Area                   |                                          | Cell Area/Total Area                   |
| Fractal Dimension                                       |                      | Minimum Radius         |                                                    | Maximum Diameter       |                                          | Roundness                              |
| Clumpiness                                              |                      | Minimum Diameter       |                                                    | Angle                  |                                          | Perimeter Ratio                        |
| Roundness                                               |                      | Radius Ratio           |                                                    |                        | w/o Mean Density, Dendrites, Density Sum |                                        |
| Angle                                                   |                      |                        |                                                    |                        | Perimeter <sup>2</sup>                   |                                        |
| Minimum Diameter                                        |                      |                        |                                                    |                        | Minimum Feret Length                     |                                        |
|                                                         |                      |                        |                                                    |                        | Hole Area                                |                                        |
| Color Designations of Morphometric Descriptors          |                      |                        |                                                    |                        | DT Descriptor Values in OS and AD        |                                        |
| Donor-Specific                                          | Passage-Specific     | All 3 Sources          |                                                    |                        | Higher OS                                | Higher AD                              |

**Fig. S7.** A subset of cytoskeleton-based descriptors characterizes early hMSC morphological heterogeneity and indicates donor, cell passage, time, and substrate dependence. Briefly, the High content descriptor data was subjected to a complementary decision tree analysis (2-fold cross validation and 66% data splitting) to discern the most influential cytoskeletal shape, intensity, and textural descriptors underlying lineage specification for the major classification studies conducted in this study.

Descriptors appearing in the decision tree as nodes are listed in each column; each column represents different conditions: varying cell sources (donor and cell passage number) with cells seeded on fibronectin-coated glass substrates in columns 1–3 (see Fig. 3 for MDS results), and temporal evolution of descriptors from a single cell source with cells seeded on glass substrates shown in columns 4–7 (see Fig. 5 for MDS results). From cell sources Donor 1 Passage 2, Donor 2 Passage 2, and Donor 1 Passage 4 (decision tree correctly classified instances of 92%, 92%, and 86%, respectively), the descriptors in red, namely hole ratio, holes, clumpiness, and minimum diameter, appear to be important features at 24 hours (with fibronectin treatment) for identifying hMSC morphological heterogeneity between cells in OS and AD induction media regardless of cell source, indicating that these descriptors may be early morphological markers of stem cell lineage commitment. Additionally, descriptors in blue, namely perimeter<sup>2</sup>, polygonal area, and roundness, also appear to be important in identifying cellular heterogeneity in this system, but are seen to be donor-specific. Those in green, namely size (width) and box ratio, are seen to be cell passage specific. Descriptors of cells seeded on glass substrates (no fibronectin treatment) appearing in the decision trees exhibited time-dependence in showing heterogeneity in cell morphometrics in OS vs. AD induction media. Consecutive removal of descriptors appearing in the decision tree at 72 h and 96 h on glass (columns 6 and 7) show that beyond intensity based descriptors (density mean and sum), morphometric descriptors (shape and texture based descriptors) provide a reliable means of making similar comparisons (all decision trees had correctly identified instances of >80%). The results indicate that at 72 h the descriptors in purple, namely mean density, dendrites, and sum of the density, have higher values for cells in OS induction media compared with those in AD induction media. These descriptors may be used to identify early hMSC priming towards osteoblastogenesis, while higher values in hole area (shown in orange) may be used to identify adipogenesis at this time point. Descriptors shown in orange (higher values in AD induction media in comparison with OS induction media) at 96 h, namely sum of the density, clumpiness, and perimeter ratio, show that these features may be used as markers of hMSC lineage-specific priming, but their usefulness in identifying long term fates is dependent on the time point at which the descriptors were obtained.
